# Supplementary material for: Identification of key genes for heart failure in dilated cardiomyopathy in different populations
Source: Front Genet. 2025 Oct 14;16:1618390. doi: 10.3389/fgene.2025.1618390 (PMC12558640; doi:10.3389/fgene.2025.1618390)
Supplement: Supplementary file 1 [file Table2.xlsx]

## Sheet:  biological process
Category	Term	Count	%	PValue	Genes	List Total	Pop Hits	Pop Total	Fold Enrichment	Bonferroni	Benjamini	FDR
GOTERM_BP_DIRECT	GO:0030198~extracellular matrix organization	7	5.426356589147287	5.38492716886334E-4	ADAMTS4, SMOC2, ECM2, CCDC80, COL14A1, COL22A1, ADAMTS9	121	164	19478	6.870892965127998	0.38714181787977564	0.2228324172946279	0.2223421369485451
GOTERM_BP_DIRECT	GO:0035567~non-canonical Wnt signaling pathway	4	3.10077519379845	5.987460296847364E-4	SFRP4, SFRP1, MYOC, FRZB	121	27	19478	23.848178757269668	0.41982363428794056	0.2228324172946279	0.2223421369485451
GOTERM_BP_DIRECT	GO:0030199~collagen fibril organization	5	3.875968992248062	7.354205191241845E-4	LUM, COL14A1, TLL2, DPT, FMOD	121	66	19478	12.195091409967443	0.4876478952769724	0.2228324172946279	0.2223421369485451
GOTERM_BP_DIRECT	GO:0042403~thyroid hormone metabolic process	3	2.3255813953488373	0.001317278137075088	SULT1B1, DIO2, CRYM	121	9	19478	53.65840220385675	0.6982616953402754	0.2993514566503137	0.2986928175817762
GOTERM_BP_DIRECT	GO:0016485~protein processing	5	3.875968992248062	0.00205698069811371	CPM, MME, IL1R2, TLL2, AEBP1	121	87	19478	9.251448655837372	0.8461413818765214	0.3739590909170725	0.373136298637827
GOTERM_BP_DIRECT	GO:0006518~peptide metabolic process	3	2.3255813953488373	0.0032633600038060244	CPM, MME, AEBP1	121	14	19478	34.49468713105077	0.9487605228367006	0.47005912689495394	0.4690248933924348
GOTERM_BP_DIRECT	GO:0042130~negative regulation of T cell proliferation	4	3.10077519379845	0.003619817258817027	IL10, PLA2G2A, PDE5A, VSIG4	121	50	19478	12.878016528925622	0.962983208590327	0.47005912689495394	0.4690248933924348
GOTERM_BP_DIRECT	GO:0030178~negative regulation of Wnt signaling pathway	4	3.10077519379845	0.0044999738516063904	SFRP4, SFRP1, FRZB, APCDD1L	121	54	19478	11.924089378634834	0.9834224756036081	0.5113095288887761	0.5101845354258745
GOTERM_BP_DIRECT	GO:0008285~negative regulation of cell population proliferation	9	6.976744186046512	0.0053930821842399	IL10, SFRP4, SFRP1, SERPINE2, FRZB, RARRES1, DPT, WNT9A, ALOX15B	121	433	19478	3.345904987307465	0.992668526147192	0.5447013006082299	0.5435028379006209
GOTERM_BP_DIRECT	GO:0007155~cell adhesion	10	7.751937984496124	0.007752978815941352	CX3CR1, MFAP4, ISLR, SIGLEC9, FAP, DPT, CNTN3, LYVE1, THBS4, HAPLN1	121	559	19478	2.8796995816023303	0.9991539390615111	0.7047457743690689	0.7031951786058807
GOTERM_BP_DIRECT	GO:0090026~positive regulation of monocyte chemotaxis	3	2.3255813953488373	0.008750729920587801	CX3CR1, CXCL10, SERPINE1	121	23	19478	20.996766079770033	0.9996609697898213	0.721041526839136	0.7194550768350895
GOTERM_BP_DIRECT	GO:0016525~negative regulation of angiogenesis	5	3.875968992248062	0.009518700024279023	CX3CR1, NPPB, CXCL10, TNMD, THBS4	121	134	19478	6.006537560133219	0.9998324019142819	0.721041526839136	0.7194550768350895
GOTERM_BP_DIRECT	GO:0008217~regulation of blood pressure	4	3.10077519379845	0.012407032785359508	NPPB, NPPA, HBB, MYH6	121	78	19478	8.255138800593347	0.9999882133160743	0.8675379078378302	0.8656291335631596
GOTERM_BP_DIRECT	GO:0097746~blood vessel diameter maintenance	3	2.3255813953488373	0.013709484116398668	NPPB, NPPA, HBB	121	29	19478	16.65260758050727	0.9999964484739446	0.8901372187004564	0.8881787209695423
GOTERM_BP_DIRECT	GO:0090090~negative regulation of canonical Wnt signaling pathway	5	3.875968992248062	0.014890898190808653	SFRP4, SFRP1, FRZB, NPPA, SHISA3	121	153	19478	5.26062766704478	0.9999988053036956	0.9023884303630044	0.9004029772708966
GOTERM_BP_DIRECT	GO:0060070~canonical Wnt signaling pathway	4	3.10077519379845	0.0278118985253334	SFRP4, SFRP1, FRZB, WNT9A	121	106	19478	6.074536098549821	0.9999999999926713	1	0.998898678414097
GOTERM_BP_DIRECT	GO:0060048~cardiac muscle contraction	3	2.3255813953488373	0.028838205979069186	TNNI1, MYH6, SCN2B	121	43	19478	11.230828368249087	0.9999999999971942	1	0.998898678414097
GOTERM_BP_DIRECT	GO:0071222~cellular response to lipopolysaccharide	5	3.875968992248062	0.03107349331609812	IL10, CX3CR1, CXCL10, SERPINE1, HMGCS2	121	192	19478	4.192062672176308	0.9999999999996546	1	0.998898678414097
GOTERM_BP_DIRECT	GO:0009617~response to bacterium	4	3.10077519379845	0.03497375599405543	CCDC80, SLC11A1, ADAMTS9, FKBP5	121	116	19478	5.550869193502423	0.9999999999999911	1	0.998898678414097
GOTERM_BP_DIRECT	GO:0006508~proteolysis	9	6.976744186046512	0.03649487729060881	ADAMTS4, CPM, FCN3, MME, FAP, ANPEP, USP9Y, AEBP1, ADAMTS9	121	615	19478	2.355734730901028	0.9999999999999979	1	0.998898678414097
GOTERM_BP_DIRECT	GO:0030308~negative regulation of cell growth	4	3.10077519379845	0.03808028241698237	NPPB, SFRP1, SERPINE2, FRZB	121	120	19478	5.3658402203856745	0.9999999999999996	1	0.998898678414097
GOTERM_BP_DIRECT	GO:0010757~negative regulation of plasminogen activation	2	1.550387596899225	0.04824510060293223	SERPINE2, SERPINE1	121	8	19478	40.243801652892564	1	1	0.998898678414097
GOTERM_BP_DIRECT	GO:0006954~inflammatory response	7	5.426356589147287	0.05109608293360617	CX3CR1, IL1RL1, CXCL10, SERPINA3, SLC11A1, PLA2G2A, IL18R1	121	432	19478	2.60839455157637	1	1	0.998898678414097
GOTERM_BP_DIRECT	GO:0042092~type 2 immune response	2	1.550387596899225	0.05411107841139452	IL10, FCER1A	121	9	19478	35.772268135904504	1	1	0.998898678414097
GOTERM_BP_DIRECT	GO:0007168~receptor guanylyl cyclase signaling pathway	2	1.550387596899225	0.06573568783582359	NPPB, NPPA	121	11	19478	29.268219383921863	1	1	0.998898678414097
GOTERM_BP_DIRECT	GO:0006182~cGMP biosynthetic process	2	1.550387596899225	0.06573568783582359	NPPB, NPPA	121	11	19478	29.268219383921863	1	1	0.998898678414097
GOTERM_BP_DIRECT	GO:0045063~T-helper 1 cell differentiation	2	1.550387596899225	0.06573568783582359	STAT4, IL18R1	121	11	19478	29.268219383921863	1	1	0.998898678414097
GOTERM_BP_DIRECT	GO:0071305~cellular response to vitamin D	2	1.550387596899225	0.06573568783582359	SFRP1, PENK	121	11	19478	29.268219383921863	1	1	0.998898678414097
GOTERM_BP_DIRECT	GO:0071560~cellular response to transforming growth factor beta stimulus	3	2.3255813953488373	0.06591957032413027	CX3CR1, SFRP1, PENK	121	68	19478	7.101847350510452	1	1	0.998898678414097
GOTERM_BP_DIRECT	GO:0070327~thyroid hormone transport	2	1.550387596899225	0.07149475278885796	SLCO4A1, CRYM	121	12	19478	26.829201101928373	1	1	0.998898678414097
GOTERM_BP_DIRECT	GO:0003229~ventricular cardiac muscle tissue development	2	1.550387596899225	0.07149475278885796	COL14A1, ADAMTS9	121	12	19478	26.829201101928373	1	1	0.998898678414097
GOTERM_BP_DIRECT	GO:0061303~cornea development in camera-type eye	2	1.550387596899225	0.07149475278885796	WNT9A, ADAMTS9	121	12	19478	26.829201101928373	1	1	0.998898678414097
GOTERM_BP_DIRECT	GO:0071493~cellular response to UV-B	2	1.550387596899225	0.07149475278885796	MFAP4, MME	121	12	19478	26.829201101928373	1	1	0.998898678414097
GOTERM_BP_DIRECT	GO:0009611~response to wounding	3	2.3255813953488373	0.07281503063295765	CX3CR1, IL1RL1, LYVE1	121	72	19478	6.707300275482094	1	1	0.998898678414097
GOTERM_BP_DIRECT	GO:0061052~negative regulation of cell growth involved in cardiac muscle cell development	2	1.550387596899225	0.07721861129169126	RGS4, PI16	121	13	19478	24.76541640178004	1	1	0.998898678414097
GOTERM_BP_DIRECT	GO:0002003~angiotensin maturation	2	1.550387596899225	0.07721861129169126	MME, ANPEP	121	13	19478	24.76541640178004	1	1	0.998898678414097
GOTERM_BP_DIRECT	GO:0045766~positive regulation of angiogenesis	4	3.10077519379845	0.07747767182205192	CX3CR1, SMOC2, SERPINE1, APLNR	121	161	19478	3.9993840151942917	1	1	0.998898678414097
GOTERM_BP_DIRECT	GO:0006936~muscle contraction	3	2.3255813953488373	0.07993163899090827	MYOT, ANKRD2, MYH6	121	76	19478	6.354284471509352	1	1	0.998898678414097
GOTERM_BP_DIRECT	GO:0010955~negative regulation of protein processing	2	1.550387596899225	0.08290747678080651	SERPINE2, IL1R2	121	14	19478	22.996458087367177	1	1	0.998898678414097
GOTERM_BP_DIRECT	GO:0007512~adult heart development	2	1.550387596899225	0.08290747678080651	APLNR, MYH6	121	14	19478	22.996458087367177	1	1	0.998898678414097
GOTERM_BP_DIRECT	GO:1900272~negative regulation of long-term synaptic potentiation	2	1.550387596899225	0.08290747678080651	CX3CR1, PTN	121	14	19478	22.996458087367177	1	1	0.998898678414097
GOTERM_BP_DIRECT	GO:0030195~negative regulation of blood coagulation	2	1.550387596899225	0.08290747678080651	SERPINE2, SERPINE1	121	14	19478	22.996458087367177	1	1	0.998898678414097
GOTERM_BP_DIRECT	GO:0030595~leukocyte chemotaxis	2	1.550387596899225	0.08290747678080651	IL10, CX3CR1	121	14	19478	22.996458087367177	1	1	0.998898678414097
GOTERM_BP_DIRECT	GO:0014898~cardiac muscle hypertrophy in response to stress	2	1.550387596899225	0.08856156138507258	NPPA, MYH6	121	15	19478	21.463360881542698	1	1	0.998898678414097
GOTERM_BP_DIRECT	GO:0003161~cardiac conduction system development	2	1.550387596899225	0.0941810759827624	NPPB, NPPA	121	16	19478	20.121900826446282	1	1	0.998898678414097
GOTERM_BP_DIRECT	GO:0060074~synapse maturation	2	1.550387596899225	0.0941810759827624	CX3CR1, SEZ6L	121	16	19478	20.121900826446282	1	1	0.998898678414097
GOTERM_BP_DIRECT	GO:0090399~replicative senescence	2	1.550387596899225	0.0941810759827624	MME, SERPINE1	121	16	19478	20.121900826446282	1	1	0.998898678414097
GOTERM_BP_DIRECT	GO:0010765~positive regulation of sodium ion transport	2	1.550387596899225	0.09976623017859901	WNK3, SCN2B	121	17	19478	18.938259601361207	1	1	0.998898678414097
GOTERM_BP_DIRECT	GO:0045778~positive regulation of ossification	2	1.550387596899225	0.09976623017859901	SCUBE2, PTN	121	17	19478	18.938259601361207	1	1	0.998898678414097

## Sheet: cellular component
Category	Term	Count	%	PValue	Genes	List Total	Pop Hits	Pop Total	Fold Enrichment	Bonferroni	Benjamini	FDR
GOTERM_CC_DIRECT	GO:0005576~extracellular region	57	44.18604651162791	1.8399008705009626E-21	SERPINA3, LAD1, CPM, FCN3, ECM2, SERPINE2, COL14A1, SERPINE1, HBB, AQP4, HAPLN1, NPPB, ADAMTS4, SCGN, ISLR, C1QTNF7, NPPA, ADAMTS9, IL10, MYOC, IL1R2, WNT9A, RNASE2, ASPN, IL17RB, SFRP4, SFRP1, CCDC80, FNDC1, CRISPLD1, MXRA5, FREM1, ITIH5, LYPD1, LTBP2, PTN, AEBP1, THBS4, SCUBE2, IL1RL1, FRZB, PENK, LCN10, NPTX2, CD163, LUM, COL22A1, PLA2G2A, MFAP4, CXCL10, SMOC2, OGN, TLL2, CNTN3, PI16, FMOD, LC…	127	2313	20795	4.035101157102444	3.146230488556646E-19	3.146230488556646E-19	3.054235445031598E-19
GOTERM_CC_DIRECT	GO:0062023~collagen-containing extracellular matrix	24	18.6046511627907	1.241937446306753E-16	ITIH5, SERPINA3, FCN3, MYOC, SERPINE2, COL14A1, LUM, COL22A1, SERPINE1, DPT, LTBP2, AEBP1, ASPN, THBS4, HAPLN1, ADAMTS4, MFAP4, SFRP1, OGN, NPPA, FMOD, ADAMTS9, FREM1, MXRA5	127	387	20795	10.154428370872246	1.8984813721090177E-14	1.0618565165922739E-14	1.030808080434605E-14
GOTERM_CC_DIRECT	GO:0005615~extracellular space	44	34.10852713178294	3.609929473419332E-15	SERPINA3, MOXD1, CPM, FCN3, SERPINE2, COL14A1, LRRC17, SERPINE1, DPT, HBB, LTBP2, PTN, AEBP1, THBS4, HAPLN1, NPPB, SCUBE2, ADAMTS4, FRZB, ANPEP, NPPA, PROM1, ADAMTS9, IL10, MYOC, LUM, COL22A1, PLA2G2A, RARRES1, WNT9A, RNASE2, ASPN, MFAP4, SFRP4, SMOC2, CXCL10, SFRP1, FAP, CRISPLD1, OGN, PI15, TLL2, PI16, FMOD	127	1867	20795	3.858900336975821	6.264988527959758E-13	2.0576597998490192E-13	1.9974943086253637E-13
GOTERM_CC_DIRECT	GO:0031012~extracellular matrix	11	8.527131782945736	1.0710426513645933E-6	ADAMTS4, ECM2, LUM, COL14A1, OGN, LRRC17, LTBP2, FMOD, ADAMTS9, HAPLN1, ASPN	127	223	20795	8.07686875463437	1.831316208172895E-4	4.578707334583636E-5	4.444827003163062E-5
GOTERM_CC_DIRECT	GO:0005604~basement membrane	6	4.651162790697675	3.113388523880461E-4	LAD1, SMOC2, CCDC80, COL22A1, FREM1, THBS4	127	97	20795	10.128257163730822	0.05185442951800279	0.010323882647989852	0.010022014734305938
GOTERM_CC_DIRECT	GO:0070062~extracellular exosome	28	21.705426356589147	3.6224149642069656E-4	SERPINA3, CPM, LAD1, SERPINE1, HBB, LTBP2, AEBP1, THBS4, ISLR, ANPEP, AOX1, PROM1, CRYM, MME, MYOC, LUM, PLA2G2A, RARRES1, RNASE2, LYVE1, ALOX15B, SFRP1, CRISPLD1, OGN, PI15, C16ORF89, MXRA5, FKBP5	127	2242	20795	2.0449261415918016	0.06007436430863211	0.010323882647989852	0.010022014734305938
GOTERM_CC_DIRECT	GO:0009986~cell surface	13	10.077519379844961	6.999229631335744E-4	CX3CR1, CPM, MME, IL1R2, SCUBE2, IL1RL1, SFRP4, SFRP1, FAP, FCER1A, PROM1, ADAMTS9, IL18R1	127	662	20795	3.2154411589789946	0.11283893754073704	0.01709811809940589	0.01659817312573905
GOTERM_CC_DIRECT	GO:0005614~interstitial matrix	3	2.3255813953488373	0.0023102719011768714	ECM2, CCDC80, COL14A1	127	12	20795	40.935039370078734	0.3266658356911827	0.04938206188765563	0.04793814194942008
GOTERM_CC_DIRECT	GO:0009897~external side of plasma membrane	8	6.2015503875969	0.013008598883920409	CX3CR1, IL1RL1, CXCL10, FCN3, CD163, ANPEP, FCER1A, AQP4	127	413	20795	3.1717221787954473	0.8934419898147866	0.24716337879448777	0.23993637941453197
GOTERM_CC_DIRECT	GO:0030667~secretory granule membrane	4	3.10077519379845	0.024155051710959996	MOXD1, SIGLEC9, MME, ANPEP	127	102	20795	6.421182646286861	0.9847201209322078	0.37550125841583265	0.3645216894563054
GOTERM_CC_DIRECT	GO:0005581~collagen trimer	4	3.10077519379845	0.024155051710959996	FCN3, C1QTNF7, COL14A1, COL22A1	127	102	20795	6.421182646286861	0.9847201209322078	0.37550125841583265	0.3645216894563054
GOTERM_CC_DIRECT	GO:0031093~platelet alpha granule lumen	3	2.3255813953488373	0.06404891589423137	SERPINA3, ISLR, SERPINE1	127	68	20795	7.223830477072719	0.9999878580361605	0.912697051492797	0.886010003203534

## Sheet: molecular function
Category	Term	Count	%	PValue	Genes	List Total	Pop Hits	Pop Total	Fold Enrichment	Bonferroni	Benjamini	FDR
GOTERM_MF_DIRECT	GO:0030021~extracellular matrix structural constituent conferring compression resistance	5	3.875968992248062	2.4651627353847276E-6	LUM, OGN, FMOD, HAPLN1, ASPN	121	16	19253	49.72365702479339	7.983948238552419E-4	7.987127262646517E-4	7.96247563529267E-4
GOTERM_MF_DIRECT	GO:0008201~heparin binding	9	6.976744186046512	1.654003567378804E-5	CXCL10, SMOC2, SFRP1, ECM2, CCDC80, SERPINE2, LTBP2, PTN, THBS4	121	179	19253	8.000230850916479	0.005344681968632359	0.0026794857791536627	0.0026712157613167685
GOTERM_MF_DIRECT	GO:0005201~extracellular matrix structural constituent	7	5.426356589147287	1.1085528146222718E-4	MFAP4, LUM, COL14A1, DPT, LTBP2, AEBP1, MXRA5	121	121	19253	9.205040639300595	0.03528166602644245	0.011972370397920535	0.011935418637433127
GOTERM_MF_DIRECT	GO:0004908~interleukin-1 receptor activity	3	2.3255813953488373	7.92665724968946E-4	IL1RL1, IL1R2, IL18R1	121	7	19253	68.19244391971665	0.22657419629449937	0.06420592372248463	0.06400775729124239
GOTERM_MF_DIRECT	GO:0017147~Wnt-protein binding	4	3.10077519379845	0.001026448805175018	SFRP4, SFRP1, FRZB, APCDD1L	121	32	19253	19.889462809917354	0.2830435737202902	0.06651388257534116	0.06630859281430615
GOTERM_MF_DIRECT	GO:0005102~signaling receptor binding	8	6.2015503875969	0.010332183240000209	NPPB, CXCL10, FCN3, BEX1, SERPINE2, NPPA, SERPINE1, WNT9A	121	384	19253	3.3149104683195594	0.9654394207501151	0.5094245204565471	0.5078522225539035
GOTERM_MF_DIRECT	GO:0030246~carbohydrate binding	6	4.651162790697675	0.011006085318505648	FCN3, SIGLEC9, ATRNL1, PTN, NPTX2, FREM1	121	214	19253	4.461187919981462	0.9722838644092046	0.5094245204565471	0.5078522225539035
GOTERM_MF_DIRECT	GO:0005506~iron ion binding	5	3.875968992248062	0.012932741656137994	CYP4Z1, CYP4B1, AOX1, PPEF1, ALOX15B	121	145	19253	5.486748361356512	0.9852651470007256	0.5237760370735888	0.5221594443665715
GOTERM_MF_DIRECT	GO:0004181~metallocarboxypeptidase activity	3	2.3255813953488373	0.020046435597501158	CPM, MME, AEBP1	121	35	19253	13.63848878394333	0.9985855714934115	0.7216716815100417	0.7194442997769859
GOTERM_MF_DIRECT	GO:0005109~frizzled binding	3	2.3255813953488373	0.023400666328943574	SFRP1, MYOC, WNT9A	121	38	19253	12.561765985210961	0.9995342838950915	0.7275557463344764	0.7253102039075182
GOTERM_MF_DIRECT	GO:0051427~hormone receptor binding	2	1.550387596899225	0.024700966696540868	NPPB, NPPA	121	4	19253	79.55785123966942	0.9996975558589992	0.7275557463344764	0.7253102039075182
GOTERM_MF_DIRECT	GO:0004222~metalloendopeptidase activity	4	3.10077519379845	0.03076091848970366	ADAMTS4, MME, TLL2, ADAMTS9	121	109	19253	5.839108347865646	0.9999598563156352	0.7846669743676286	0.7822451627183458
GOTERM_MF_DIRECT	GO:0004867~serine-type endopeptidase inhibitor activity	4	3.10077519379845	0.03148355144067645	ITIH5, SERPINA3, SERPINE2, SERPINE1	121	110	19253	5.7860255447032305	0.9999684740432377	0.7846669743676286	0.7822451627183458
GOTERM_MF_DIRECT	GO:0005509~calcium ion binding	10	7.751937984496124	0.041557404344248094	SCUBE2, SMOC2, SCGN, PLA2G2A, TLL2, LTBP2, PPEF1, ALOX15B, THBS4, ASPN	121	739	19253	2.153121819747481	0.9999989348309205	0.9617570719668844	0.9587886859422954
GOTERM_MF_DIRECT	GO:0003953~NAD+ nucleosidase activity	2	1.550387596899225	0.06648030827228253	IL1RL1, IL18R1	121	11	19253	28.930127723516154	0.9999999997910662	1	1
GOTERM_MF_DIRECT	GO:0005518~collagen binding	3	2.3255813953488373	0.07074797548963524	LUM, COL14A1, AEBP1	121	70	19253	6.819244391971665	0.9999999999526566	1	1
GOTERM_MF_DIRECT	GO:0005313~L-glutamate transmembrane transporter activity	2	1.550387596899225	0.07808782828823867	SLC25A18, SLC1A7	121	13	19253	24.479338842975206	0.9999999999963741	1	1
GOTERM_MF_DIRECT	GO:0005178~integrin binding	4	3.10077519379845	0.07844687336694829	ECM2, FAP, PTN, THBS4	121	160	19253	3.9778925619834715	0.999999999996804	1	1
GOTERM_MF_DIRECT	GO:0008083~growth factor activity	4	3.10077519379845	0.08305786313940318	IL10, OGN, PTN, THBS4	121	164	19253	3.880870792178996	0.9999999999993708	1	1
GOTERM_MF_DIRECT	GO:0008237~metallopeptidase activity	3	2.3255813953488373	0.08710666503494056	ADAMTS4, ANPEP, ADAMTS9	121	79	19253	6.042368448582487	0.99999999999985	1	1
GOTERM_MF_DIRECT	GO:0061809~NAD+ nucleosidase activity, cyclic ADP-ribose generating	2	1.550387596899225	0.09523126551768991	IL1RL1, IL18R1	121	16	19253	19.889462809917354	0.9999999999999917	1	1
GOTERM_MF_DIRECT	GO:0015250~water channel activity	2	1.550387596899225	0.09523126551768991	AQP4, AQP3	121	16	19253	19.889462809917354	0.9999999999999917	1	1

## Sheet: pathway
Category	Term	Count	%	PValue	Genes	List Total	Pop Hits	Pop Total	Fold Enrichment	Bonferroni	Benjamini	FDR
KEGG_PATHWAY	hsa00480:Glutathione metabolism	4	3.10077519379845	0.007397480516866945	ANPEP, MGST1, CHAC2, GSTM5	59	59	8534	9.806377477736284	0.6437319498639653	0.8417179671288828	0.8417179671288828
KEGG_PATHWAY	hsa04060:Cytokine-cytokine receptor interaction	7	5.426356589147287	0.015205775947313694	IL10, CX3CR1, IL1RL1, CXCL10, IL1R2, IL17RB, IL18R1	59	298	8534	3.3976794448868164	0.8811433486376131	0.8417179671288828	0.8417179671288828
KEGG_PATHWAY	hsa05143:African trypanosomiasis	3	2.3255813953488373	0.025965573685320816	IL10, NPPA, HBB	59	37	8534	11.727897388914338	0.9741875840231818	0.8417179671288828	0.8417179671288828
KEGG_PATHWAY	hsa04310:Wnt signaling pathway	5	3.875968992248062	0.03018752166871326	SFRP4, SFRP1, FRZB, APCDD1L, WNT9A	59	174	8534	4.156438729787648	0.9858876376024228	0.8417179671288828	0.8417179671288828
KEGG_PATHWAY	hsa04061:Viral protein interaction with cytokine and cytokine receptor	4	3.10077519379845	0.030277624716866288	IL10, CX3CR1, CXCL10, IL18R1	59	100	8534	5.785762711864407	0.9860687236638097	0.8417179671288828	0.8417179671288828
KEGG_PATHWAY	hsa05144:Malaria	3	2.3255813953488373	0.045163228508848276	IL10, HBB, THBS4	59	50	8534	8.67864406779661	0.9983776301835603	1	1
KEGG_PATHWAY	hsa04820:Cytoskeleton in muscle cells	5	3.875968992248062	0.07232049175812917	MYOT, TNNI1, ANKRD2, MYH6, THBS4	59	232	8534	3.117329047340736	0.9999706020585493	1	1
KEGG_PATHWAY	hsa05321:Inflammatory bowel disease	3	2.3255813953488373	0.07386155046806091	IL10, STAT4, IL18R1	59	66	8534	6.574730354391372	0.9999766679903394	1	1
KEGG_PATHWAY	hsa00982:Drug metabolism - cytochrome P450	3	2.3255813953488373	0.08784527141153894	MGST1, AOX1, GSTM5	59	73	8534	5.9442767587648015	0.9999971847081398	1	1

## Sheet: GSEA
ID	Description	setSize	enrichmentScore	NES	pvalue	p.adjust	qvalue	rank	leading_edge	core_enrichment
KEGG_TYPE_I_DIABETES_MELLITUS	KEGG_TYPE_I_DIABETES_MELLITUS	30	0.775663	2.25304	7.10626e-07	0.000125781	0.00010996	1216	tags=50%, list=10%, signal=45%	HLA-DQA1/HLA-DPB1/PRF1/GZMB/HLA-DPA1/HLA-DMB/HLA-DRA/CPE/HLA-DMA/HLA-DOA/HLA-DQB1/HLA-F/HLA-B/HLA-A/HLA-E
KEGG_GRAFT_VERSUS_HOST_DISEASE	KEGG_GRAFT_VERSUS_HOST_DISEASE	25	0.796361	2.19442	2.18917e-06	0.000193741	0.000169372	1216	tags=60%, list=10%, signal=54%	HLA-DQA1/HLA-DPB1/PRF1/GZMB/HLA-DPA1/HLA-DMB/HLA-DRA/HLA-DMA/KLRD1/HLA-DOA/HLA-DQB1/HLA-F/HLA-B/HLA-A/HLA-E
KEGG_ANTIGEN_PROCESSING_AND_PRESENTATION	KEGG_ANTIGEN_PROCESSING_AND_PRESENTATION	48	0.667712	2.1046	3.39844e-06	0.000200508	0.000175288	1951	tags=46%, list=16%, signal=39%	HLA-DQA1/HSPA2/HLA-DPB1/HLA-DPA1/HLA-DMB/CD74/HLA-DRA/HLA-DMA/KLRD1/HLA-DOA/HLA-DQB1/HLA-F/HLA-B/CD8A/HLA-A/TAPBP/HLA-E/CIITA/NFYC/RFX5/HSPA1L/HSP90AB1
KEGG_CELL_ADHESION_MOLECULES_CAMS	KEGG_CELL_ADHESION_MOLECULES_CAMS	103	0.504852	1.83551	9.53e-05	0.00421702	0.0036866	1220	tags=30%, list=10%, signal=27%	HLA-DQA1/ITGAL/HLA-DPB1/HLA-DPA1/HLA-DMB/HLA-DRA/CD2/NRXN2/HLA-DMA/SELL/JAM2/HLA-DOA/HLA-DQB1/JAM3/NFASC/ITGA8/ITGB7/VCAN/SELP/CD6/HLA-F/NLGN3/SDC2/SPN/HLA-B/CD8A/SDC3/ICOSLG/HLA-A/HLA-E/CLDN5
KEGG_ALLOGRAFT_REJECTION	KEGG_ALLOGRAFT_REJECTION	26	0.694856	1.93907	0.00052407	0.0185521	0.0162186	1216	tags=54%, list=10%, signal=49%	HLA-DQA1/HLA-DPB1/PRF1/GZMB/HLA-DPA1/HLA-DMB/HLA-DRA/HLA-DMA/HLA-DOA/HLA-DQB1/HLA-F/HLA-B/HLA-A/HLA-E
KEGG_VIRAL_MYOCARDITIS	KEGG_VIRAL_MYOCARDITIS	59	0.538944	1.7578	0.00113758	0.0335586	0.0293376	1252	tags=36%, list=10%, signal=32%	HLA-DQA1/ITGAL/HLA-DPB1/PRF1/MYH10/HLA-DPA1/HLA-DMB/HLA-DRA/HLA-DMA/MYH11/HLA-DOA/CCND1/HLA-DQB1/SGCG/MYH7B/HLA-F/HLA-B/FYN/HLA-A/HLA-E/SGCA
KEGG_COMPLEMENT_AND_COAGULATION_CASCADES	KEGG_COMPLEMENT_AND_COAGULATION_CASCADES	49	-0.567108	-1.86241	0.00139299	0.0352227	0.0307924	1161	tags=39%, list=9%, signal=35%	C5/THBD/C1R/PLAUR/KNG1/CD59/C5AR1/C1QC/C3AR1/SERPINF2/TFPI/F5/C1QB/F8/C3/CR1/SERPINA5/F13A1/SERPINE1
KEGG_SPHINGOLIPID_METABOLISM	KEGG_SPHINGOLIPID_METABOLISM	24	-0.649349	-1.84938	0.00194676	0.0430721	0.0376545	1808	tags=50%, list=14%, signal=43%	SPHK2/SGPP1/SGMS1/SPHK1/SMPD2/UGCG/ACER3/GLA/SGMS2/DEGS1/B4GALT6/SGPP2
KEGG_APOPTOSIS	KEGG_APOPTOSIS	76	-0.479142	-1.67271	0.00245549	0.0475637	0.0415811	3412	tags=47%, list=27%, signal=35%	IKBKB/CYCS/RIPK1/IL1RAP/AKT3/CFLAR/ENDOG/BAD/BAX/BIRC2/CAPN1/PPP3CA/FADD/PRKX/CASP7/XIAP/TNFRSF10B/TNFRSF10D/TNFRSF10A/PRKAR2A/IRAK2/IRAK4/PIK3R3/MYD88/IRAK1/PIK3CB/TNFRSF1A/CHUK/NGF/BIRC3/PPP3CC/PIK3R5/IRAK3/BCL2L1/BID/IL1R1
KEGG_PARKINSONS_DISEASE	KEGG_PARKINSONS_DISEASE	85	0.476972	1.66327	0.00268721	0.0475637	0.0415811	4318	tags=56%, list=35%, signal=37%	UCHL1/SNCA/SNCAIP/UBE2L6/UBB/PPID/NDUFA10/CASP9/NDUFA8/UQCRQ/SDHA/NDUFV1/COX7A2L/NDUFA9/SLC25A5/COX8A/SLC18A2/LRRK2/VDAC3/NDUFB5/NDUFS1/NDUFA3/NDUFA1/NDUFS3/COX4I2/NDUFC1/COX6B1/UQCR10/SDHD/NDUFB8/NDUFB1/UQCRC2/COX7A1/NDUFB7/UBA1/COX7A2/PARK7/SDHB/COX4I1/UQCRFS1/NDUFS4/COX5B/COX6C/NDUFA4/NDUFS2/APAF1/NDUFB4/UQCRC1
